# Supplementary material for: XPS and Raman study of the active-sites on molybdenum disulfide nanopetals for photocatalytic removal of rhodamine B and doxycycline hydrochlride
Source: Royal Society of Chemistry journal article supplement (doi:10.1039/c8ra08027e), 2018-01-01
Supplement: c8ra08027e1.pdf [file c8ra08027e1.pdf]

## XPS and Raman study of the active-sites on Molybdenum disulfide nanopetals for Photocatalytic removal of Rhodamine B and Doxycycline Hydrochloride

Xuefeng Ai, Hougang Fan\*, Yijun Wang, Yumeng Guo, Xiaoyan Liu, LiliYang, Huilian Liu and  
Jinghai Yang\*

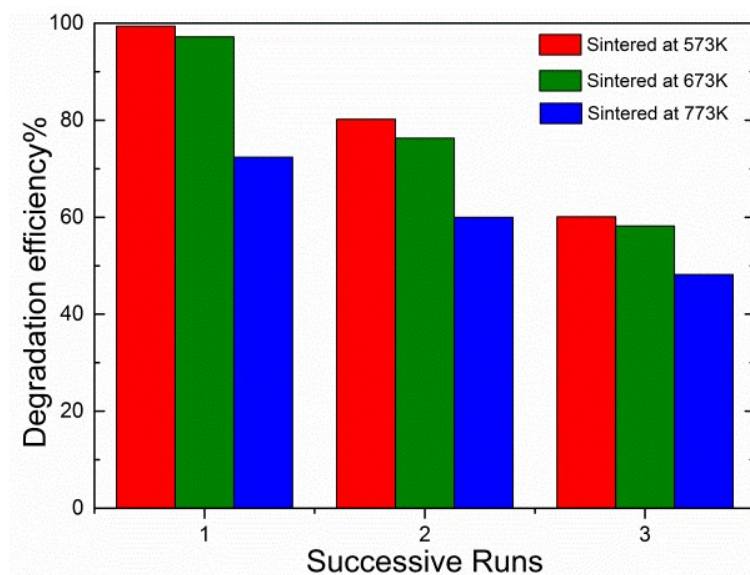

Figure S1. Photocatalytic degradation of RhB for three cycles.

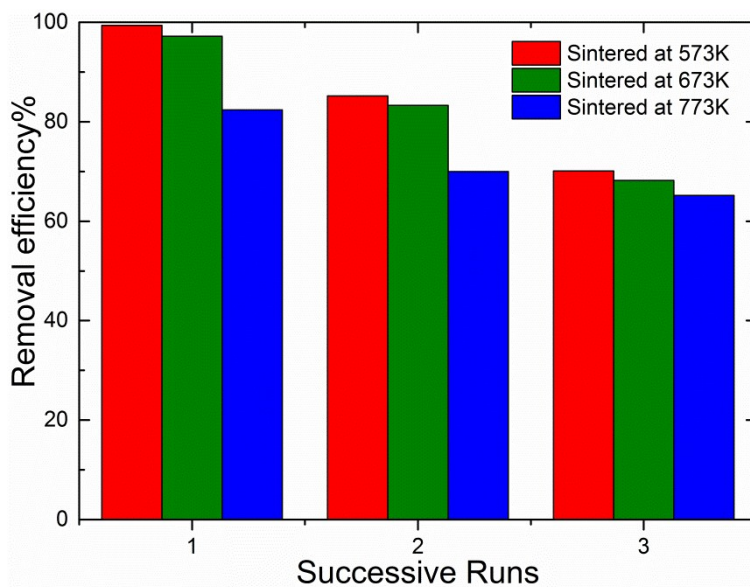

Figure S2. Photocatalytic removal of DCHC for three cycles.

---

Corresponding author: Hougang Fan and Jinghai Yang, Email: fanhougang@jlnu.edu.cn,  
jhyang1@jlnu.edu.cn.

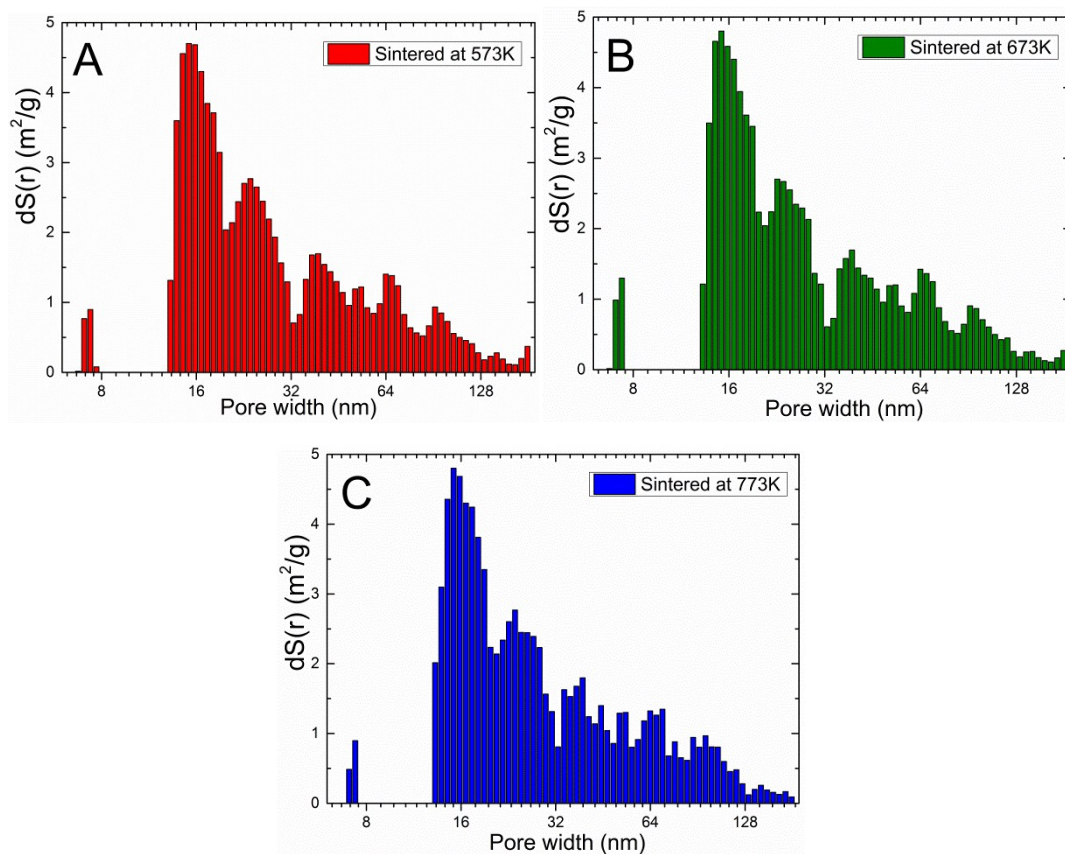

Figure S3. Pore diameter distribution of different MoS<sub>2</sub> nanopetals

Table S1. BET specific surface area of different samples.

| Sample           | Pore volume<br>(cm <sup>3</sup> /g) | BET specic<br>surface(m <sup>2</sup> /g) | Half pore<br>width(nm) | Fitting<br>error |
|------------------|-------------------------------------|------------------------------------------|------------------------|------------------|
| sintered at 573K | 0.845                               | 141.974                                  | 66.883                 | 1.353 %          |
| sintered at 673K | 0.839                               | 140.112                                  | 68.256                 | 1.412 %          |
| sintered at 773K | 0.840                               | 140.534                                  | 69.923                 | 1.580 %          |

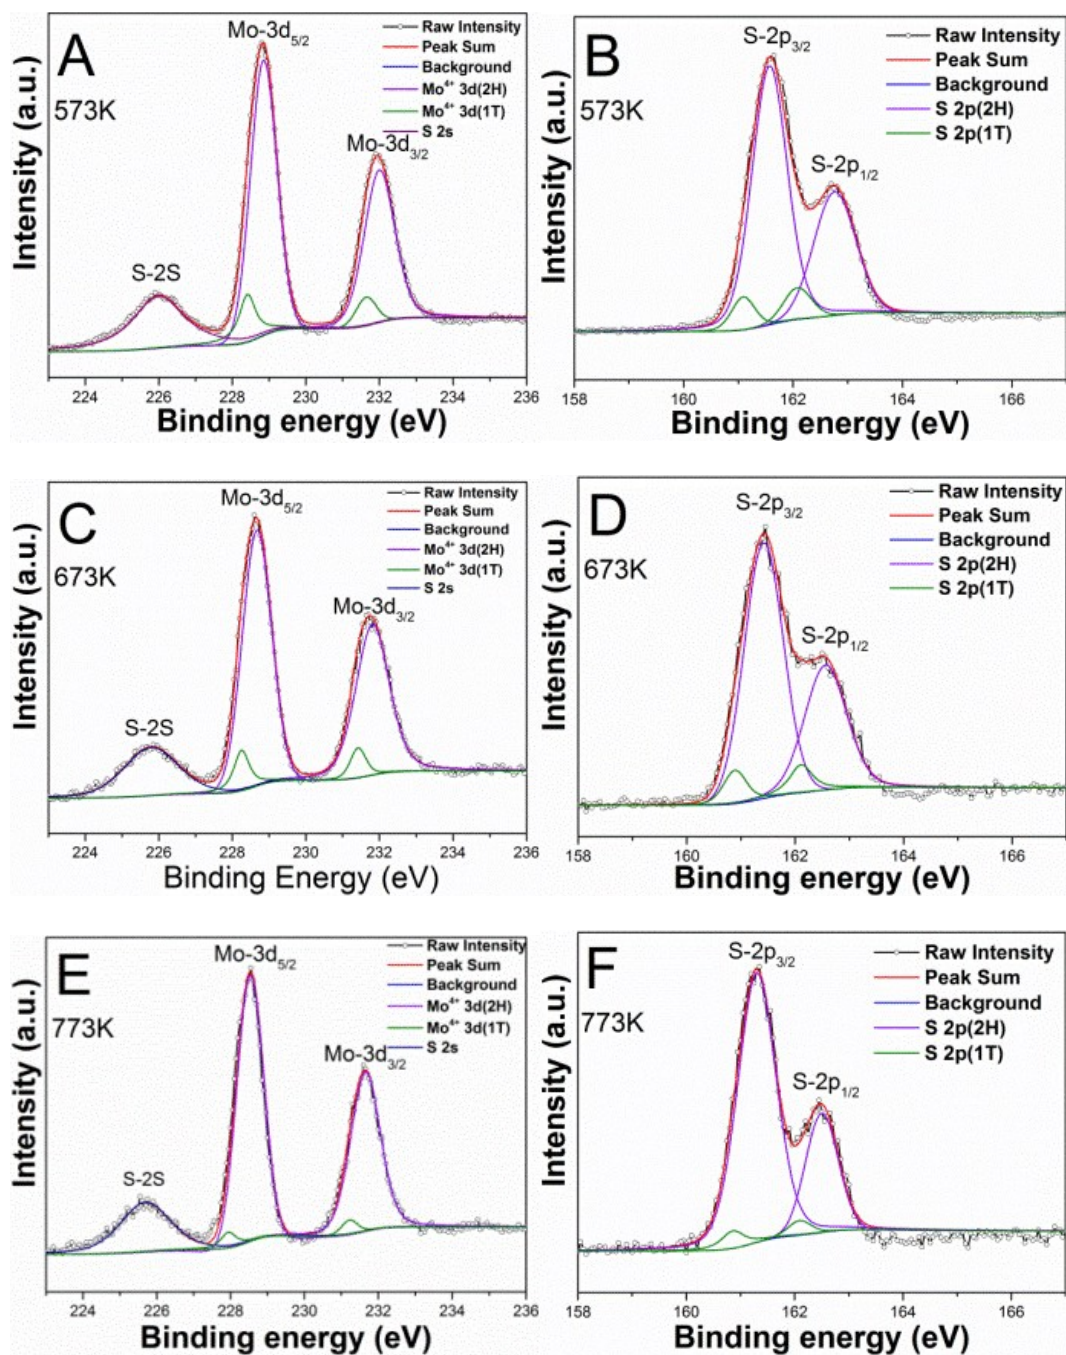

Figure S4. High-resolution XPS spectra of Mo-3d (A, C, E) and S-2p (B, D, F)
